# Supplementary material for: Instrumented Mouthguards in Elite-Level Men’s and Women’s Rugby Union: The Incidence and Propensity of Head Acceleration Events in Matches
Source: Springer Nature journal article supplement (doi:10.1007/s40279-023-01953-7), 2023-10-31
Supplement: MOESM1 [file 40279_2023_1953_MOESM1_ESM.pdf]

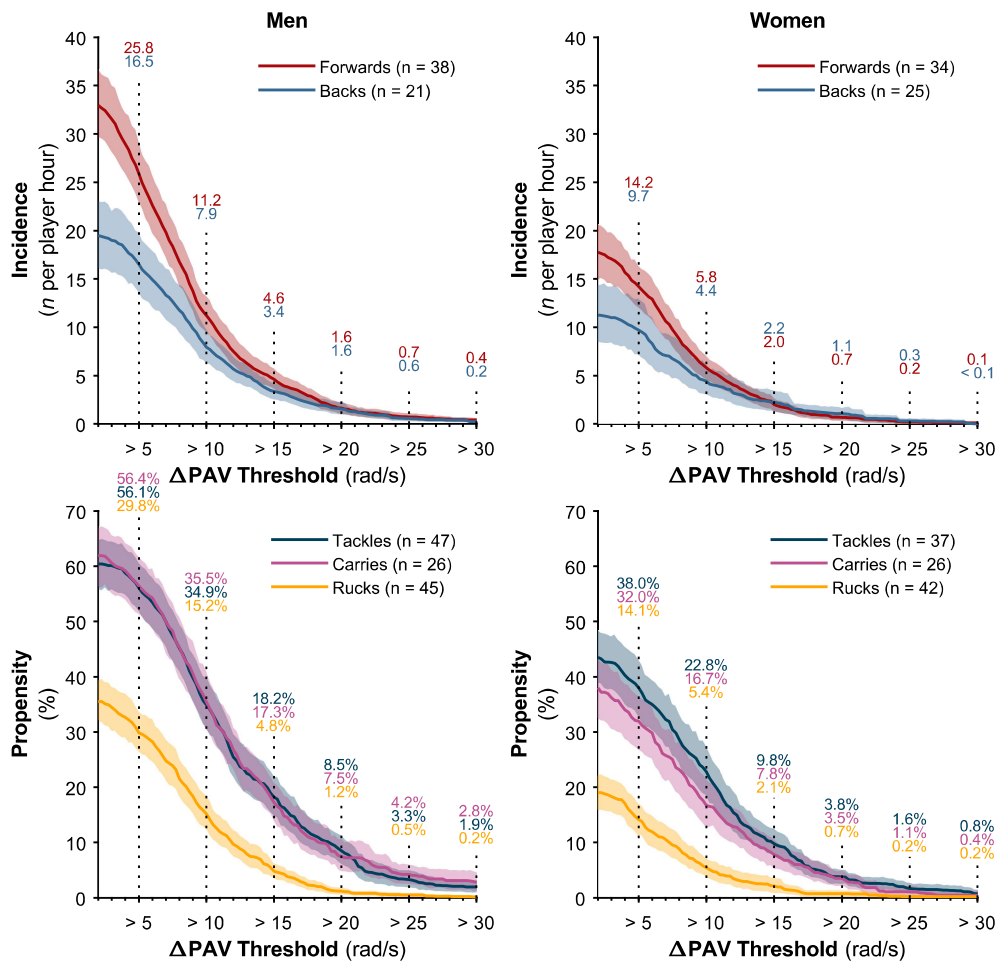

**Supplementary Figure 1.** The incidence of HAEs and the propensity of tackles, carries and rucks to result in at least one HAE exceeding a given threshold presented across  $\Delta$ PAV thresholds (5 to 30 rad/s) for men's and women's players. Shaded regions indicate 95% CI. The number of players available to calculate each curve is shown as  $n$ . Text labels are added at intervals along the curve.  $\Delta$ PAV was calculated by zeroing x, y, and z components of angular velocity to the trigger point and the peak value was taken from a recalculated resultant curve from the zeroed components.

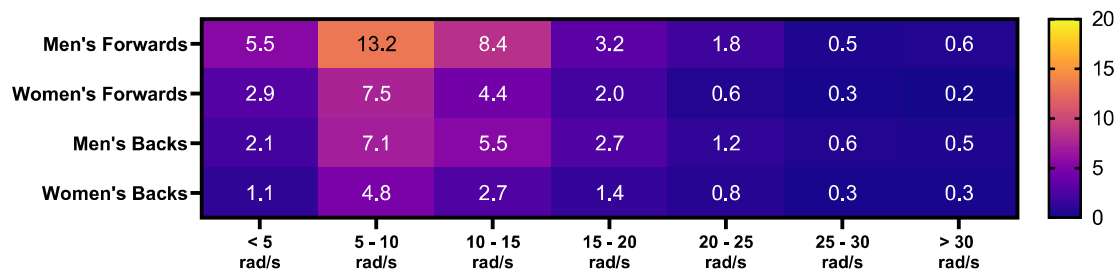

**Supplementary Figure 2.** Incidence values between  $\Delta$ PAV thresholds.

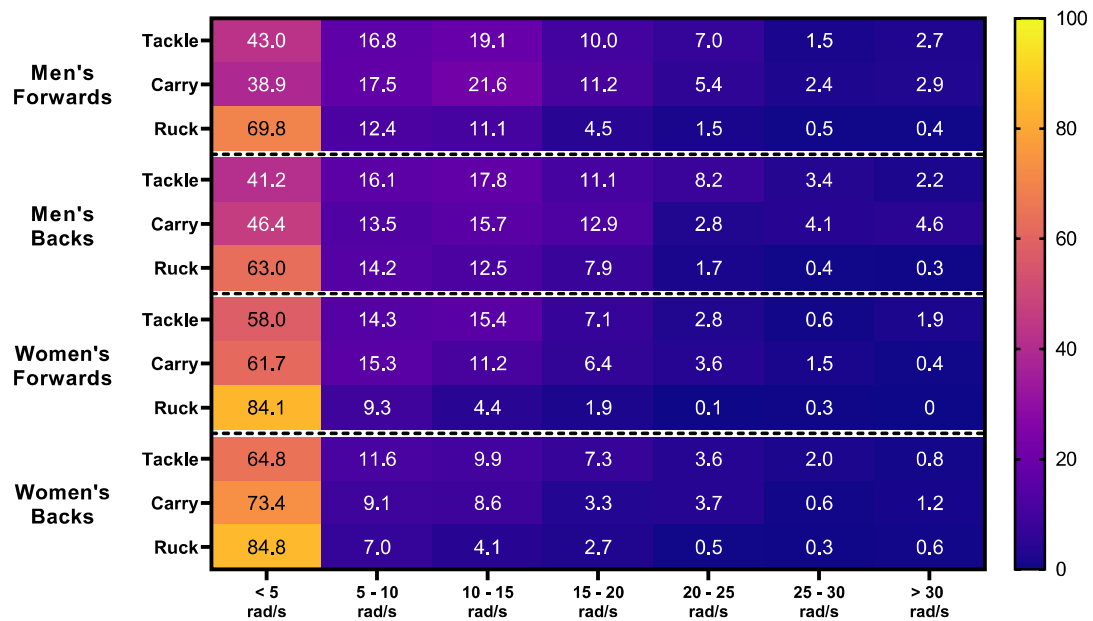

**Supplementary Figure 3.** Propensity values between  $\Delta$ PAV thresholds.

|                         | Median (IQR)         |
|-------------------------|----------------------|
| <b>Men's Forwards</b>   | 20.97 (8.25 – 28.33) |
| <b>Men's Backs</b>      | 12.87 (9.00 – 16.69) |
| <b>Women's Forwards</b> | 10.59 (8.57 – 15.00) |
| <b>Women's Backs</b>    | 6.08 (3.56 – 9.90)   |

**Supplementary Table 1.** Incidence values presented as median (25<sup>th</sup> to 75<sup>th</sup> percentile) as per King et al., 2016<sup>21</sup>.
